# Supplementary material for: Steroidal alkaloids and conessine from the medicinal plant Holarrhena antidysenterica restore antibiotic efficacy in a Galleria mellonella model of multidrug-resistant Pseudomonas aeruginosa infection
Source: BMC Complement Altern Med. 2018 Oct 19;18:285. doi: 10.1186/s12906-018-2348-9 (PMC6194700; doi:10.1186/s12906-018-2348-9)
Supplement: Supplementary file 1 — Raw data for steroidal alkaloid and conessine toxicity in vivo. (XLS 39 kb) [file 12906_2018_2348_MOESM1_ESM.xls]

## Sheet: Data
		Hr. 24
	Agents	Dead	%Dead	Survive	%Survive
	50 mg/kg Conessine	0	0	30	100
	200 mg/kg Steroidal alkaloids	0	0	30	100
	PBS	0	0	30	100
	Unmanipulated	0	0	30	100
		Hr. 48
	Agents	Dead	%Dead	Survive	%Survive
	50 mg/kg Conessine	0	0	30	100
	200 mg/kg Steroidal alkaloids	0	0	30	100
	PBS	0	0	30	100
	Unmanipulated	0	0	30	100
		Hr. 72
	Agents	Dead	%Dead	Survive	%Survive
	50 mg/kg Conessine	0	0	30	100
	200 mg/kg Steroidal alkaloids	0	0	30	100
	PBS	0	0	30	100
	Unmanipulated	0	0	30	100
		Hr. 96
	Agents	Dead	%Dead	Survive	%Survive
	50 mg/kg Conessine	0	0	30	100
	200 mg/kg Steroidal alkaloids	0	0	30	100
	PBS	0	0	30	100
	Unmanipulated	0	0	30	100

## Sheet: Graph
		Time	Conessine 50 mg/kg	Steroidal alkaloids 200 mg/kg	PBS	Unmanipulated
		0	100	100	100	100
		24	100	100	100	100
		24	100	100	100	100
		48	100	100	100	100
		48	100	100	100	100
		72	100	100	100	100
		72	100	100	100	100
		96	100	100	100	100
		96	100	100	100	100
